# Supplementary material
Source: bioRxiv or medRxiv preprint supplement (https://www.biorxiv.org/highwire/filestream/133590/field_highwire_adjunct_files/1/443754-2.pdf)
Supplement: Supplementary file [file 443754-2.pdf]

# Accompanying scripts for “Comparison of single-cell whole-genome amplification strategies”

*Nuria Estévez-Gómez, Tamara Prieto, Amy Guillaumet-Adkins, Holger Heyn,  
Sonia Prado-López & David Posada*

## Contents

|          |                                                                                                |           |
|----------|------------------------------------------------------------------------------------------------|-----------|
| <b>1</b> | <b>Pre-processing <i>bulk</i> NGS data</b>                                                     | <b>2</b>  |
| 1.1      | Clipping adaptors and removing reads shorter than 70bp . . . . .                               | 2         |
| 1.2      | Mapping reads . . . . .                                                                        | 2         |
| 1.3      | Sorting reads . . . . .                                                                        | 3         |
| 1.4      | Marking duplicates and merging different read groups . . . . .                                 | 3         |
| 1.5      | Recalibrating base quality scores . . . . .                                                    | 3         |
| <b>2</b> | <b>Pre-processing <i>single-cell</i> NGS data</b>                                              | <b>5</b>  |
| 2.1      | Clipping adaptors and removing reads shorter than 70bp . . . . .                               | 5         |
| 2.2      | Mapping reads . . . . .                                                                        | 6         |
| 2.3      | Sorting reads . . . . .                                                                        | 8         |
| 2.4      | Marking duplicates . . . . .                                                                   | 8         |
| 2.5      | Recalibrating base quality scores . . . . .                                                    | 9         |
| <b>3</b> | <b>Predicting single-cell breadths at higher sequencing depths</b>                             | <b>10</b> |
| 3.1      | Obtaining sequencing depth . . . . .                                                           | 10        |
| 3.2      | Downsampling to the lowest single-cell sequencing depth . . . . .                              | 10        |
| 3.3      | Running Preseq gc_extrap . . . . .                                                             | 11        |
| <b>4</b> | <b>Assessing coverage uniformity</b>                                                           | <b>11</b> |
| 4.1      | Computing base depths along the genome . . . . .                                               | 11        |
| 4.2      | Reconstructing lorenz curves and calculating gini index . . . . .                              | 12        |
| <b>5</b> | <b>Testing for amplification recurrence</b>                                                    | <b>13</b> |
| 5.1      | Filtering reads and obtaining sequencing depths . . . . .                                      | 13        |
| 5.2      | Obtaining read counts along 1Mb genome windows . . . . .                                       | 14        |
| 5.3      | Obtaining gc content along 1Mb genome windows . . . . .                                        | 15        |
| 5.4      | Testing for amplification correlation using 1Mb window read counts . . . . .                   | 15        |
| 5.5      | Creating coverage presence/absence matrix . . . . .                                            | 16        |
| 5.6      | Testing for amplification recurrence using Jaccard similarity coefficients (with permutations) | 16        |
| <b>6</b> | <b>Quantifying allelic imbalance (AI), allelic dropout (ADO) and false SNVs.</b>               | <b>19</b> |
| 6.1      | Quantifying AI . . . . .                                                                       | 20        |
| 6.2      | Quantifying false SNVs and ADO . . . . .                                                       | 24        |
| <b>7</b> | <b>Quantifying chimeric amplicons</b>                                                          | <b>31</b> |
| <b>8</b> | <b>Estimating copy-number profiles and MAD values</b>                                          | <b>32</b> |
| 8.1      | Running ginkgo on the web server . . . . .                                                     | 32        |

# 1 Pre-processing *bulk* NGS data

## 1.1 Clipping adaptors and removing reads shorter than 70bp

```
#!/bin/sh
#SBATCH -N 1
#SBATCH -n 1
#SBATCH --cpus-per-task 1

source ReadConfig.sh $1
SAMPLE=$(sed "${SLURM_ARRAY_TASK_ID}q;d" ${ORIDIR}/${SAMPLELIST})
echo $SAMPLE

cutadapt --minimum-length 70 \
  -a IndexedAdapter=AGATCGGAAGAGCACACGTCTGAACTCCAGTCACATCTCGTATGCCGTCTTCTGCTTG \
  -A UniversalAdapter=AGATCGGAAGAGCGTCGTGTAGGGAAAGAGTGTAGATCTCGGTGGTCGCCGTATCATT \
  -o ${WORKDIR}/${SAMPLE}.trimmed_1.fastq.gz \
  -p ${WORKDIR}/${SAMPLE}.trimmed_2.fastq.gz \
  ${ORIDIR}/${SAMPLE}_1.fastq.gz ${ORIDIR}/${SAMPLE}_2.fastq.gz
```

## 1.2 Mapping reads

```
#!/bin/sh
#SBATCH -N 1
#SBATCH -n 1
#SBATCH --cpus-per-task 1

source ReadConfig.sh $1
SAMPLE=$(sed "${SLURM_ARRAY_TASK_ID}q;d" ${ORIDIR}/${SAMPLELIST})
ID=${SAMPLE}
sample=$(echo $SAMPLELIST | sed 's/Files.//')
SM=${sample}
PL="ILLUMINA"
if [ $SAMPLELIST == "Files.Caco-2" ]
then
  LB="TruSeqDNAPCR-Free"
elif [ $SAMPLELIST == "Files.Z-138" ]
then
  LB="CNAGin-house"
elif [ $SAMPLELIST == "Files.HDF" ]
then
  LB="NxSeqAmpFREELowDNA"
fi
PU=`zcat ${ORIDIR}/${SAMPLE}_1.fastq.gz | head -1 | sed 's/[:].*//' | sed 's/@//'|`

RG="@RG\tID:${ID}\tSM:${SM}\tPL:${PL}\tLB:${LB}\tPU:${PU}"

bwa mem -t 8 -M -R ${RG} ${RESDIR}/${REF}.fa \
  ${WORKDIR}/${SAMPLE}.trimmed_1.fastq.gz \
  ${WORKDIR}/${SAMPLE}.trimmed_2.fastq.gz > ${WORKDIR}/${SAMPLE}.bam
```

### 1.3 Sorting reads

```
#!/bin/sh
#SBATCH -N 1
#SBATCH -n 1
#SBATCH --cpus-per-task 1

source ReadConfig.sh $1
SAMPLE=$(sed "${SLURM_ARRAY_TASK_ID}q;d" ${ORIDIR}/${SAMPLELIST})
echo $SAMPLE

java -jar $PICARD SortSam \
    I=${WORKDIR}/${SAMPLE}.bam \
    TMP_DIR=${WORKDIR} \
    O=${WORKDIR}/${SAMPLE}.sorted.bam \
    CREATE_INDEX=true \
    SORT_ORDER=coordinate
```

### 1.4 Marking duplicates and merging different read groups

```
#!/bin/sh
#SBATCH -N 1
#SBATCH -n 1
#SBATCH --cpus-per-task 1

source ReadConfig.sh $1

samples=$(awk -v dir=$WORKDIR '{print "I="dir"$0".sorted.bam"}' ${ORIDIR}/${SAMPLELIST} | \
    tr '\n' ' ')
SAMPLE=$(echo $SAMPLELIST | sed 's/Files.//')

java -jar $PICARD MarkDuplicates \
    ${samples} \
    OUTPUT=${WORKDIR}/${SAMPLE}.dedup.bam \
    CREATE_INDEX=true \
    TMP_DIR=${WORKDIR} \
    M=${WORKDIR}/Duplicates_${SAMPLE}.txt \
    VALIDATION_STRINGENCY=LENIENT
```

### 1.5 Recalibrating base quality scores

```
#!/bin/sh
#SBATCH -N 1
#SBATCH -n 1
#SBATCH --cpus-per-task 8

source ReadConfig.sh $1
SAMPLE=$(echo $SAMPLELIST | sed 's/Files.//')
echo $SAMPLE
```

```
java -jar $GATK \  
    -T BaseRecalibrator \  
    -nct 8 \  
    -R ${RESDIR}/${REF}.fa \  
    -I ${WORKDIR}/${SAMPLE}.dedup.bam \  
    -knownSites ${RESDIR}/dbsnp_138.b37.vcf \  
    -knownSites ${RESDIR}/Mills_and_1000G_gold_standard.indels.b37.vcf \  
    -o ${WORKDIR}/RecalibrationReportI_${SAMPLE}.grp
```

```
#!/bin/sh  
#SBATCH -N 1  
#SBATCH -n 1  
#SBATCH --cpus-per-task 1
```

```
source ReadConfig.sh $1  
SAMPLE=$(echo $SAMPLELIST | sed 's/Files.//')  
echo $SAMPLE  
  
java -jar $GATK \  
    -T PrintReads \  
    -I ${WORKDIR}/${SAMPLE}.dedup.bam \  
    -BQSR ${WORKDIR}/RecalibrationReportI_${SAMPLE}.grp \  
    -o ${WORKDIR}/${SAMPLE}.recal.bam \  
    -R ${RESDIR}/${REF}.fa
```

## 2 Pre-processing *single-cell* NGS data

### 2.1 Clipping adaptors and removing reads shorter than 70bp

```
#!/bin/sh
#SBATCH -N 1
#SBATCH -n 1
#SBATCH --cpus-per-task 1

source ReadConfig.sh $1
SAMPLE=$(sed "${SLURM_ARRAY_TASK_ID}q;d" ${ORIDIR}/${SAMPLELIST})
echo $SAMPLE

if [[ ${SAMPLE} == *"NX"* ]]
then
    Adapter1="CTGTCTCTTATACACATCTCCGAGCCCACGAGAC"
    Adapter2="CTGTCTCTTATACACATCTGACGCTGCCGACGA"
elif [[ ${SAMPLE} == *"SS"* ]]
then
    Adapter1="CTGTCTCTTGATCACA"
    Adapter2="CTGTCTCTTGATCACA"
elif [[ ${SAMPLE} == *"CW"* ]]
then
    Adapter1="AGATCGGAAGAGCACACGTCTGAACTCCAGTCACNNNNNNATCTCGTATGCCGTCTTCTGCTTG"
    Adapter2="AGATCGGAAGAGCGTCGTGTAGGGAAAGAGTGTAGATCTCGGTGGTCGCCGTATCATT"
elif [[ ${SAMPLE} == *"NS"* ]]
then
    Adapter1="AGATCGGAAGAGCACACGTCTGAACTCCAGTCACNNNNNNATCTCGTATGCCGTCTTCTGCTTG"
    Adapter2="AGATCGGAAGAGCGTCGTGTAGGGAAAGAGTGTAGATCTCGGTGGTCGCCGTATCATT"
else
    echo "CutAdapt not needed"
    exit
fi

cutadapt --minimum-length 70 -a AdapterA=$Adapter1 \
    -A AdapterB=$Adapter2 \
    -o ${WORKDIR}/${SAMPLE}.trimmed_1.fastq.gz \
    -p ${WORKDIR}/${SAMPLE}.trimmed_2.fastq.gz \
    ${ORIDIR}/${SAMPLE}_1.fastq.gz ${ORIDIR}/${SAMPLE}_2.fastq.gz

#!/bin/sh
#SBATCH -N 1
#SBATCH -n 1
#SBATCH --cpus-per-task 1

source ReadConfig.sh $1
SAMPLE=$(sed "${SLURM_ARRAY_TASK_ID}q;d" ${ORIDIR}/${IDLIST})
echo $SAMPLE

if [[ ${WGA_LIBRARY} == "AMPLI-1" ]]
```

```

then
    Adapter1="GCTGTCAGTTAA"
    Adapter2="TTAACTGACAGCAGGAATCCCACT"
    adapters_to_remove="-g Adapter5=${Adapter1} -G Adapter5=${Adapter1} \
-a Adapter3=${Adapter2} -A Adapter3=${Adapter2}"
elif [[ ${WGA_LIBRARY} == "MALBAC" ]]
then
    Adapter1="GTGAGTGATGGTTGAGGTAGTGTGGAG"
    Adapter2="CTCCACACTACCTCAACCATCACTCAC"
    adapters_to_remove="-g Adapter5=${Adapter1} -G Adapter5=${Adapter1} \
-a Adapter3=${Adapter2} -A Adapter3=${Adapter2}"
elif [[ ${WGA_LIBRARY} == "PICOPLEX" ]]
then
    Adapter1="TGTGTTGGGTGTGTTTGG"
    Adapter2="CCAAACACACCCAACACA"
    Adapter3="TGTGTTGGGTGTGTTTGG"
    Adapter4="CCAACACAACCCACAACA"
    Adapter5="TGTGTTGGGTGTGTTTGG"
    Adapter6="CCAAACACACCCAACACA"
    adapters_to_remove="-g Adapter5=${Adapter1} -G Adapter5=${Adapter1} \
-a Adapter3=${Adapter2} -A Adapter3=${Adapter2} \
-g Adapter5.2=${Adapter3} -G Adapter5.2=${Adapter3} \
-a Adapter3.2=${Adapter4} -A Adapter3.2=${Adapter4} \
-g Adapter5.3=${Adapter5} -G Adapter5.3=${Adapter5} \
-a Adapter3.3=${Adapter6} -A Adapter3.3=${Adapter6}"
else
    echo "CutAdapt not needed for ${WGA_LIBRARY}?"
    ln -s ${WORKDIR}/${SAMPLE}.trimmed_1.fastq.gz \
    ${WORKDIR}/${SAMPLE}.trimmed2_1.fastq.gz
    ln -s ${WORKDIR}/${SAMPLE}.trimmed_2.fastq.gz \
    ${WORKDIR}/${SAMPLE}.trimmed2_2.fastq.gz
    exit
fi

cutadapt --minimum-length 70 ${adapters_to_remove} \
-o ${WORKDIR}/${SAMPLE}.trimmed2_1.fastq.gz \
-p ${WORKDIR}/${SAMPLE}.trimmed2_2.fastq.gz \
${WORKDIR}/${SAMPLE}.trimmed_1.fastq.gz \
${WORKDIR}/${SAMPLE}.trimmed_2.fastq.gz > ${WORKDIR}/${SAMPLE}_CutadaptWGA.txt

```

## 2.2 Mapping reads

```

#!/bin/sh
#SBATCH -N 1
#SBATCH -n 1
#SBATCH --cpus-per-task 1

source ReadConfig.sh $1
SAMPLE=$(sed "${SLURM_ARRAY_TASK_ID}q;d" ${ORIDIR}/${SAMPLELIST})
echo $SAMPLE

```

```
ID=${SAMPLE}

SM=${SAMPLE}

if [[ ${SAMPLE} == *"NX"* ]]
then
    LB="Nextera"
elif [[ ${SAMPLE} == *"SS"* ]]
then
    LB="SureSelectQXT"
elif [[ ${SAMPLE} == *"CW"* ]]
then
    LB="CNAGin-house"
elif [[ ${SAMPLE} == *"NS"* ]]
then
    LB="NxSeqAmpFREELowDNA"
else
    echo "not working"
    exit
fi

PL="ILLUMINA"
PU=`zcat ${ORIDIR}/${SAMPLE}_1.fastq.gz | head -1 | sed 's/[[:].*//]' | sed 's/@//'\`
echo "@RG\tID:${ID}\tSM:${SM}\tPL:${PL}\tLB:${LB}\tPU:${PU}" > ${WORKDIR}/RG_${SAMPLE}
```

```
#!/bin/sh
#SBATCH -N 1
#SBATCH -n 1
#SBATCH --cpus-per-task 4

source ReadConfig.sh $1
SAMPLE=$(sed "${SLURM_ARRAY_TASK_ID}q;d" ${ORIDIR}/${SAMPLELIST})
echo $SAMPLE

read -r RG < ${WORKDIR}/RG_${SAMPLE}
bwa mem -t 4 -M -R ${RG} ${RESDIR}/${REF}.fa \
    ${WORKDIR}/${SAMPLE}.trimmed_1.fastq.gz \
    ${WORKDIR}/${SAMPLE}.trimmed_2.fastq.gz > ${WORKDIR}/${SAMPLE}.bam
```

```
#!/bin/sh
#SBATCH -N 1
#SBATCH -n 1
#SBATCH -t 02:00:00

source ReadConfig.sh $1
SAMPLE=$(sed "${SLURM_ARRAY_TASK_ID}q;d" ${ORIDIR}/${SAMPLELIST})
echo $SAMPLE

SM=${SAMPLE}
LB="IonPlus"
```

```
PU=$(grep -m 1 "^@" ${WORKDIR}/${SAMPLE}.fastq | sed 's/:.*//' | sed 's/@//')

tmap mapall \
  --fn-fasta ${RESDIR}/${REF}.fa \
  --fn-reads ${WORKDIR}/${SAMPLE}.fastq \
  --num-threads 4 \
  -R "ID:${SAMPLE}" -R "PL:IONTORRENT" -R "SM:${SAMPLE}" -R "PU:${PU}" -R "LB:${LB}" \
  --reads-format fastq \
  --output-type 2 \
  --fn-sam ${WORKDIR}/${SAMPLE}.bam \
  -v stage1 map4 -Y -u
```

## 2.3 Sorting reads

```
#!/bin/sh
#SBATCH -N 1
#SBATCH -n 1
#SBATCH --cpus-per-task 1

source ReadConfig.sh $1
SAMPLE=$(sed "${SLURM_ARRAY_TASK_ID}q;d" ${ORIDIR}/${SAMPLELIST})
echo $SAMPLE

java -jar $PICARD SortSam \
  I=${WORKDIR}/${SAMPLE}.bam \
  TMP_DIR=${WORKDIR} \
  O=${WORKDIR}/${SAMPLE}.sorted.bam \
  CREATE_INDEX=true \
  SORT_ORDER=coordinate
```

## 2.4 Marking duplicates

```
#!/bin/sh
#SBATCH -N 1
#SBATCH -n 1
#SBATCH --cpus-per-task 1

source ReadConfig.sh $1
SAMPLE=$(sed "${SLURM_ARRAY_TASK_ID}q;d" ${ORIDIR}/${SAMPLELIST})
echo $SAMPLE

java -jar $PICARD MarkDuplicates \
  INPUT=${WORKDIR}/${SAMPLE}.sorted.bam \
  OUTPUT=${WORKDIR}/${SAMPLE}.dedup.bam \
  CREATE_INDEX=true \
  TMP_DIR=${WORKDIR} \
  M=${WORKDIR}/Duplicates_${SAMPLE}.txt \
  VALIDATION_STRINGENCY=LENIENT
```



## 2.5 Recalibrating base quality scores

```
#!/bin/sh
#SBATCH -N 1
#SBATCH -n 1
#SBATCH --cpus-per-task 8

source ReadConfig.sh $1
SAMPLE=$(sed "${SLURM_ARRAY_TASK_ID}q;d" ${ORIDIR}/${SAMPLELIST})
echo $SAMPLE

java -jar $GATK \
    -T BaseRecalibrator \
    -nct 8 \
    -R ${RESDIR}/${REF}.fa \
    -I ${WORKDIR}/${SAMPLE}.dedup.bam \
    -knownSites ${RESDIR}/dbsnp_138.b37.vcf \
    -knownSites ${RESDIR}/Mills_and_1000G_gold_standard.indels.b37.vcf \
    -o ${WORKDIR}/RecalibrationReportI_${SAMPLE}.grp

#!/bin/sh
#SBATCH -N 1
#SBATCH -n 1
#SBATCH --cpus-per-task 1

source ReadConfig.sh $1
SAMPLE=$(sed "${SLURM_ARRAY_TASK_ID}q;d" ${ORIDIR}/${SAMPLELIST})
echo $SAMPLE

java -jar $GATK \
    -T PrintReads \
    -I ${WORKDIR}/${SAMPLE}.dedup.bam \
    -BQSR ${WORKDIR}/RecalibrationReportI_${SAMPLE}.grp \
    -o ${WORKDIR}/${SAMPLE}.recal.bam \
    -R ${RESDIR}/${REF}.fa
```

## 3 Predicting single-cell breadths at higher sequencing depths

### 3.1 Obtaining sequencing depth

```
#!/bin/sh
#SBATCH -N 1
#SBATCH -n 1
#SBATCH --cpus-per-task 1

source ReadConfig.sh $1
SAMPLE=$(sed "${SLURM_ARRAY_TASK_ID}q;d" ${ORIDIR}/${SAMPLELIST})
echo $SAMPLE

if [[ $SAMPLE = *"IP"* ]]
then
    raw_reads=$(grep "TOTAL_READS" \
        ${WORKDIR}/${SAMPLE}.alignment_summary_metrics.txt | awk '{print $3}')
    aligned_soft_bases=$(samtools view $WORKDIR/${SAMPLE}.dedup.bam \
        | cut -f10 | awk '{total+=length}END{print total}')
    hard_bases=$(samtools view $WORKDIR/${SAMPLE}.dedup.bam | cut -f6 \
        | grep H | sed 's/\([A-Z]\)[0-9]/\1\n/g' | grep H | sed 's/H//' | \
        awk '{sum+=1}END{print sum}')
    if [ -z "$hard_bases" ];then
        hard_bases=0
    fi
    raw_bases=$((aligned_soft_bases + $hard_bases))
    genome_length=$(cat ${RESDIR}/${REF}.fai | cut -f2 | \
        awk '{sum+=1}END{print sum}')
    sequencing_depth=$(awk -v genomelength=$genome_length \
        -v rawbases=$raw_bases 'BEGIN{print rawbases/genomelength}')
else
    raw_reads=$(zcat ${ORIDIR}/${SAMPLE}_1.fastq.gz | awk 'END{print NR/4}')
    genome_length=$(cat ${RESDIR}/${REF}.fai | cut -f2 | \
        awk '{sum+=1}END{print sum}')
    sequencing_depth=$(zcat ${ORIDIR}/${SAMPLE}_1.fastq.gz | head -2 \
        | tail -n 1 | wc -c | awk -v rawreads=$raw_reads \
        -v genomelength=$genome_length '{print (($1 - 1)*(rawreads*2))/genomelength}')
fi
echo $SAMPLE $sequencing_depth > ${WORKDIR}/${SAMPLE}.seqdepth.txt
```

### 3.2 Downsampling to the lowest single-cell sequencing depth

```
#!/bin/sh
#SBATCH -N 1
#SBATCH -n 1
#SBATCH --cpus-per-task 1

source ReadConfig.sh $1
SAMPLE=$(sed "${SLURM_ARRAY_TASK_ID}q;d" ${ORIDIR}/${SAMPLELIST})
echo $SAMPLE
```

```

config=$(basename $1 | sed 's/.txt//' | sed 's/Config.//' | sed 's/.SC//')

sequencing_depth=$(awk '{print $2}' ${WORKDIR}/${SAMPLE}.seqdepth.txt)
echo $SAMPLE $sequencing_depth

subsampling_depth=$(awk '{print $2}' ${WORKDIR}/${config}.seqdepths.txt \
| sort -n | head -n 1)
## Calculating subsampling probability
probability=`bc -l <<< "scale=3; $subsampling_depth / $sequencing_depth"`
echo "Downsampling probability: "$probability

strategy="Chained"
echo "Downsampling following "${strategy}" strategy. \
From "${sequencing_depth}"X to "${subsampling_depth}"X."
java -jar $PICARD DownsampleSam \
    INPUT=${WORKDIR}/${SAMPLE}.dedup.bam \
    OUTPUT=${WORKDIR}/${SAMPLE}.dedup.ds.bam \
    RANDOM_SEED=1 \
    PROBABILITY=${probability} \
    STRATEGY=$strategy

```

### 3.3 Running Preseq gc\_extrap

```

#!/bin/sh
#SBATCH -N 1
#SBATCH -n 1
#SBATCH --cpus-per-task 4

source ReadConfig.sh $1
SAMPLE=$(sed "${SLURM_ARRAY_TASK_ID}q;d" ${ORIDIR}/${SAMPLELIST})
echo $SAMPLE

bam2mr -o ${WORKDIR}/${SAMPLE}.mr ${WORKDIR}/${SAMPLE}.sorted.ds.bam
preseq gc_extrap -v -o ${WORKDIR}/${SAMPLE}_inferredcov.txt ${WORKDIR}/${SAMPLE}.mr

```

## 4 Assessing coverage uniformity

### 4.1 Computing base depths along the genome

```

#!/bin/sh
#SBATCH -N 1
#SBATCH -n 1
#SBATCH --cpus-per-task 1

source ReadConfig.sh $1
SAMPLE=$(sed "${SLURM_ARRAY_TASK_ID}q;d" ${ORIDIR}/${SAMPLELIST})
echo $SAMPLE

bedtools genomecov \

```

```
-ibam ${WORKDIR}/${SAMPLE}.dedup.ps.bam | \
grep "^genome" > ${WORKDIR}/${SAMPLE}_genome.ps.bed
```

## 4.2 Reconstructing lorenz curves and calculating gini index

```
library(ineq)
library(data.table)
library(ggplot2)
library(reshape)
library(ggpubr)
library(RColorBrewer)

Lorenz.Gini <-function(cell_line) {
genomebed<-fread(paste("LorenzCurvesIneq_",cell_line,".txt",sep=""),
  colClasses = c("factor","numeric","numeric"),
  col.names = c("Sample","reads", "times"))

# Plot the lorez curves
lcpersample<-function(sample) {
  genomebed<-genomebed[which(genomebed$Sample==sample),]
  lc<-Lc(genomebed$reads,genomebed$times/3137454505)
  sample<-rep(sample,length(lc$p))
  scWGAkit<-sub("GP","GenomiPhi",sub("AM","Ampli1",
    sub("TP","TruePrime",sub("PP","PicoPLEX",
    sub("MB","MALBAC",sub("RG","REPLIg",
    sub("-.*$", "", sample))))))
  mydata<-cbind.data.frame(sample,scWGAkit,lc$p, lc$L)
  colnames(mydata) <- c("Sample","scWGA kit","x","y")
  return(mydata)
}
lcs<-lapply(levels(as.factor(genomebed$Sample)), lcpersample)
# cbind all data.frames in one list
mydata<-merge_recurse(lcs)
library(RColorBrewer)
cols<- brewer.pal(8, name="Dark2")[c(1:8)]
mycols<-rep(cols,each=table(sapply(lcs,function(x) unique(x[,2]))))
lorenz<-ggplot(data=mydata) +
  geom_line(aes(x,y,col=`Sample`), alpha=0.5) +
  scale_color_manual(values = mycols) +
  scale_linetype_manual(values = c("dashed")) +
  coord_cartesian(xlim = c(0.55,1)) +
  labs(x="Cumulative fraction of reads",
    y="Cumulative fraction of \ngenome coverage breadth",
    title=cell_line) +
  theme(text=element_text(size=8, family="Arial"),
    axis.title=element_text (face="bold"),
    axis.line = element_line(colour = "black"),
    panel.grid.major = element_blank(),
    panel.grid.minor = element_blank(),
    panel.border = element_blank(),
    panel.background = element_rect(fill = "white"),
    plot.title = element_text(hjust = 0.5),
```

```

        legend.position = "none")

# Calculate gini index and compare
gini<-function(sample) {
  genomebed<-genomebed[which(genomebed$Sample==sample),]
  x<-sample(x=genomebed$reads, size = 1000000,
            prob = genomebed$times, replace=TRUE)
  gini<-Gini(x, corr=TRUE)
  names(gini) <- sample
  return(gini)
}
ginis<-as.data.frame(unlist(lapply(levels(as.factor(genomebed$Sample)), gini)))
ginis$Samples<-rownames(ginis)
rownames(ginis) <- NULL
colnames(ginis) <- c("gini","Sample")
scWGAKit<-sub("GP","GenomiPhi",sub("AM","Ampli1",
  sub("TP","TruePrime",sub("PP","PicoPLEX",
    sub("MB","MALBAC",sub("RG","REPLig",
      sub("-.*$", "", ginis$Sample))))))
gini<-cbind.data.frame(scWGAKit,ginis)
ginis<-ggplot(data=ginis) +
  geom_boxplot(aes(x=scWGAKit, y=gini, color=scWGAKit), outlier.shape = NA) +
  geom_jitter(aes(x=scWGAKit, y=gini, color=scWGAKit)) +
  scale_color_brewer(palette = "Dark2") +
  labs(x="scWGA kit", y="Gini index") +
  theme(text=element_text(size=8, family="Arial"),
        axis.title=element_text (face="bold"),
        axis.line = element_line(colour = "black"),
        panel.grid.major = element_blank(),
        panel.grid.minor = element_blank(),
        panel.border = element_blank(),
        panel.background = element_rect(fill = "white"),
        plot.title = element_text(hjust = 0.5),
        legend.position = "none")

grid.arrange(lorenz, ginis, nrow = 1)
}

```

## 5 Testing for amplification recurrence

### 5.1 Filtering reads and obtaining sequencing depths

```

#!/bin/sh
#SBATCH -N 1
#SBATCH -n 1
#SBATCH --cpus-per-task 1

source ReadConfig.sh $1

```

```
SAMPLE=$(sed "${SLURM_ARRAY_TASK_ID}q;d" ${ORIDIR}/${SAMPLELIST})
echo $SAMPLE

samtools view -F 1284 -b ${WORKDIR}/${SAMPLE}.dedup.bam > ${WORKDIR}/${SAMPLE}.flt.cov.bam
samtools index ${WORKDIR}/${SAMPLE}.flt.cov.bam
raw_reads=$(samtools flagstat ${WORKDIR}/${SAMPLE}.flt.cov.bam | grep "in total" \
| awk '{print $1}')
genome_length=$(cat ${RESDIR}/${REF}.fai | cut -f2 | awk '{sum+=$1}END{print sum}')
sequencing_depth=$(awk -v rawreads=$raw_reads -v genomelength=$genome_length \
'BEGIN{print 150*rawreads/genomelength}')
echo $SAMPLE $sequencing_depth > ${WORKDIR}/${SAMPLE}.cor.seqdepth.txt
```

## 5.2 Obtaining read counts along 1Mb genome windows

```
#!/bin/sh
#SBATCH -N 1
#SBATCH -n 1
#SBATCH --cpus-per-task 1

source ReadConfig.sh $1
SAMPLE=$(sed "${SLURM_ARRAY_TASK_ID}q;d" ${ORIDIR}/${SAMPLELIST})

config=$(basename $1 | sed 's/.txt//' | sed 's/Config.//' | sed 's/.SC//')
sequencing_depth=$(awk '{print $2}' ${WORKDIR}/${SAMPLE}.cor.seqdepth.txt)
echo $sequencing_depth

subsampling_depth=0.1
probability=`bc -l <<< "scale=3; $subsampling_depth / $sequencing_depth"`
strategy="HighAccuracy"

echo "Downsampling following "${strategy}" strategy. \
From "${sequencing_depth}"X to "${subsampling_depth}"X."
java -jar $PICARD DownsampleSam \
    INPUT=${WORKDIR}/${SAMPLE}.flt.cov.bam \
    OUTPUT=${WORKDIR}/${SAMPLE}.cor.bam \
    RANDOM_SEED=1 \
    PROBABILITY=${probability} \
    STRATEGY=$strategy \
    CREATE_INDEX=true

python /home/uvi/be/tpf/apps/pysamstats/scripts/pysamstats \
    -t coverage_binned \
    ${WORKDIR}/${SAMPLE}.cor.bam \
    --max-depth=1000000000 \
    --fasta ${RESDIR}/${REF}.fa \
    --window-size=1000000 \
    --omit-header | cut -f4 > ${WORKDIR}/${SAMPLE}.1Mb.cov.txt
```

\*Strategy followed for bulk downsampling was “Chained” instead of “HighAccuracy”

### 5.3 Obtaining gc content along 1Mb genome windows

```
#!/bin/sh
#SBATCH -N 1
#SBATCH -n 1
#SBATCH --cpus-per-task 1

source ReadConfig.sh $1
cat ${RESDIR}/${REF}.fai | cut -f1-2 > ${WORKDIR}/chrom.sizes
bedtools makewindows -g ${WORKDIR}/chrom.sizes -w 1000000 \
> ${WORKDIR}/${REF}.1Mbwindows.bed
bedtools nuc -fi ${RESDIR}/${REF}.fa -bed ${WORKDIR}/${REF}.1Mbwindows.bed \
| cut -f4,5,10,12 | tail -n +2 \
| awk '{print $1"\t"$2"\t"$3"$4"}' > ${WORKDIR}/GC.1Mbwindows.bed
```

### 5.4 Testing for amplification correlation using 1Mb window read counts

```
library(data.table)
library(Hmisc)
library(RColorBrewer)
library(corrplot)

gc_content<-fread("/Users/tama/Downloads/GC.1Mbwindows.bed", \
                 col.names = c("AT","GC"), colClasses = c("numeric"), na.strings = "NA")
x <- fread("HDF.1Mb.June.Bulk.txt", col.names = c("Ampli1-10","Ampli1-2",
                                                "Ampli1-5","Ampli1-9",
                                                "GenomiPhi-1","GenomiPhi-6",
                                                "GenomiPhi-7","GenomiPhi-9",
                                                "Bulk","MALBAC-10",
                                                "MALBAC-3","MALBAC-4",
                                                "MALBAC-8","PicoPLEX-2",
                                                "PicoPLEX-3","PicoPLEX-4",
                                                "PicoPLEX-5","REPLIg-10",
                                                "REPLIg-13","REPLIg-1",
                                                "REPLIg-2","TruePrime-10",
                                                "TruePrime-4","TruePrime-7",
                                                "TruePrime-9"))

x <-x[,c(1:4,10:17,5:8,18:25,9)]
corrgc<-rcorr(x=as.matrix(x), y=as.matrix(gc_content[, -1]), type="pearson")
pvalgc<-corrgc$P
corgc<-corrgc$r
colnames(pvalgc)[26] <- "GC content"
colnames(corgc)[26] <- "GC content"
rownames(pvalgc)[26] <- "GC content"
rownames(corgc)[26] <- "GC content"

corrplot(as.matrix(corgc), type = "lower",
         sig.level = 0.05,
         col=brewer.pal(10,'RdYlBu'),
         method="circle", tl.col = "black",
```

```
p.mat=as.matrix(pvalgc),
insig = "blank",
addgrid.col=NA,
number.digits=NULL,
diag=FALSE)
```

## 5.5 Creating coverage presence/absence matrix

```
#!/bin/sh

while read sample
do
  bedtools genomecov -ibam ${WORKDIR}/${SAMPLE}.cor.bam \
  -bg > ${WORKDIR}/${SAMPLE}.cor.bedGraph
  awk '{if ($4>0){print $1"\t"$2"\t"$3"\t"1}else {print $0}}' \
  $sample.cor.bedGraph > $sample.cor2.bedGraph
done < $GLUSTER/Single-Cell/SC_HDF.txt

# union all the bedgraph files
bedtools unionbedg -i *cor2.bedGraph | cut -f4- \
| tr -t "\t" " ," > Intersection.genome.bedGraph

# remove singletons from the begraph file
bedtools unionbedg -i *cor2.bedGraph | cut -f1,4- \
| uniq -c | cut -f2- > Intersection.genome.notrep.bedGraph
```

## 5.6 Testing for amplification recurrence using Jaccard similarity coefficients (with permutations)

```
library(data.table)

# Read data
PresAbs <- fread("Intersection.genome.notrep.bedGraph",
  col.names = c("Ampli1-10","Ampli1-2",
    "Ampli1-5","Ampli1-9",
    "GenomiPhi-1","GenomiPhi-6",
    "GenomiPhi-7","GenomiPhi-9",
    "MALBAC-10","MALBAC-3",
    "MALBAC-4","MALBAC-8",
    "PicoPLEX-2","PicoPLEX-3",
    "PicoPLEX-4","PicoPLEX-5",
    "REPLIg-10","REPLIg-13",
    "REPLIg-1","REPLIg-2",
    "TruePrime-10","TruePrime-4",
    "TruePrime-7","TruePrime-9"))

PresAbs <-PresAbs[,c(1:4,9:16,5:8,17:24)]
```



```

library(jaccard)
PresAbs<-as.data.frame(PresAbs)
jaccard_estimates <- apply(
  expand.grid(colnames(PresAbs),colnames(PresAbs)),
  1, FUN = function(x) {
    dat<-as.data.frame(PresAbs[,c(x[1],x[2])])
    names(dat) <- c("X","Y")
    jaccard(dat$X, dat$Y)
  })

matrix_jaccard_estimates <- matrix(jaccard_estimates, ncol=length(colnames(PresAbs)))
colnames(matrix_jaccard_estimates) <- colnames(PresAbs)
rownames(matrix_jaccard_estimates) <- colnames(PresAbs)

write.table(as.data.frame(matrix_jaccard_estimates),"JaccardValues.txt", quote=FALSE)

# Get pvalues for jaccard through permutations

Combinations_required <-as.data.frame(matrix(combn(colnames(PresAbs), 2),
                                              nrow=276, byrow=T))
jaccard_pvalues_permutations <- apply(Combinations_required,
                                     1, FUN = function(x) {
  dat<-as.data.frame(PresAbs[,c(x[1],x[2])])
  names(dat) <- c("X","Y")
  total <- length(dat$X)
  times_0_1 <- table(dat$X)
  times_0 <- times_0_1[1]
  times_1 <- times_0_1[2]
  prob_0 <- times_0/total
  prob_1 <- times_1/total
  permut<-function (x) {
    jaccard(resampled <- sample(c(0,1), size = length(dat$X),
                              replace = TRUE, prob = c(prob_0,prob_1)), dat$Y)
  }
  resampled_jaccard<-sapply(1:1000,permut)
  observed<-jaccard(dat$X, dat$Y)
  # Test whether the observed value is higher
  # or equal than all of the numbers estimated randomly
  sum(resampled_jaccard >= observed)/length(resampled_jaccard) # alternative
})

out2 <- jaccard_pvalues_permutations
class(out2) <- "dist"
attr(out2, "Labels") <- as.character(colnames(PresAbs))
attr(out2, "Size") <- length(colnames(PresAbs))
attr(out2, "Upper") <- TRUE
attr(out2, "Diag") <- TRUE
out2 <- as.matrix(out2)
diag(out2) <- NA

write.table(as.data.frame(out2),"JaccardPValues.txt", quote=FALSE)

```

```
# Plot Jaccard and remove non significant values
library(corrplot)
library(RColorBrewer)
png(height=1200, width=1200, pointsize=25, file="CorrMatrixJaccardPermutations.png")

col1=brewer.pal(9, 'YlOrRd')[2]
col2=brewer.pal(8, 'Set2')[5]
col3=brewer.pal(9, 'BuGn')[5]
col4=brewer.pal(9, 'Blues')[5]
col5=brewer.pal(9, 'BuPu')[6]
col6 <- colorRampPalette(c("white", "white", "white", "white", "white",
                           col1, col2, col3, col4, col5))

corrplot(matrix_jaccard_estimates, type = "full",
         sig.level = 0.05,
         col=col6(20),
         method="circle",
         number.cex = .5,
         tl.col = "black",
         p.mat=out2,
         insig = "blank",
         is.corr = FALSE,
         number.digits=4,
         diag=FALSE)
dev.off()
```

## 6 Quantifying allelic imbalance (AI), allelic dropout (ADO) and false SNVs.

Realigning single-cell and bulk reads all together around known indels.

```
#!/bin/sh
#SBATCH -N 1
#SBATCH -n 1
#SBATCH --cpus-per-task 1

source ReadConfig.sh $1

samples=$(awk -v dir=$WORKDIR '{print "-I "dir$0".recal.bam"}' \
${ORIDIR}/${SAMPLELIST} | tr '\n' ' ')
cell_line=HDF

java -jar $GATK \
  -T RealignerTargetCreator \
  ${samples} \
  ${cell_line} \
  -R ${RESDIR}/${REF}.fa \
  -known ${RESDIR}/Mills_and_1000G_gold_standard.indels.b37.vcf \
  -known ${RESDIR}/1000G_phase1.indels.b37.vcf \
  -o ${WORKDIR}/${cell_line}.intervals

#!/bin/sh
#SBATCH -N 1
#SBATCH -n 1
#SBATCH --cpus-per-task 1

source ReadConfig.sh $1

samples=$(awk -v dir=$WORKDIR '{print "-I "dir$0".recal.bam"}' \
${ORIDIR}/${SAMPLELIST} | tr '\n' ' ')
cell_line=HDF

cd ${WORKDIR}
awk -v cl=$cell_line \
'BEGIN{print cl".recal.bam\t"cl".real.bam"}{print $0".recal.bam\t"$0".real.bam"}'\
${ORIDIR}/${SAMPLELIST} > ${WORKDIR}/${SLURM_JOBID}.map

java -jar $GATK \
  -T IndelRealigner \
  -I ${WORKDIR}/${cell_line}.recal.bam \
  $samples \
  -known ${RESDIR}/Mills_and_1000G_gold_standard.indels.b37.vcf \
  -known ${RESDIR}/1000G_phase1.indels.b37.vcf \
  -targetIntervals ${WORKDIR}/${cell_line}.intervals \
  -R ${RESDIR}/${REF}.fa \
  --nWayOut ${WORKDIR}/${SLURM_JOBID}.map

rm ${WORKDIR}/${SLURM_JOBID}.map
```

## 6.1 Quantifying AI

### 6.1.1 Calling heterozygous variants in PCR-free amplified bulk

```
#!/bin/sh

source ReadConfig.sh $1
SAMPLE=$(echo $SAMPLELIST | sed 's/.txt//' | sed 's/SC_//' | sed 's/Files./')
java -jar $GATK \
    -T HaplotypeCaller \
    -nct 8 \
    --pcr_indel_model NONE \
    -R ${RESDIR}/${REF}.fa \
    -I ${WORKDIR}/${SAMPLE}.real.bam \
    --dbsnp ${RESDIR}/dbsnp_138.b37.vcf \
    -o ${WORKDIR}/HaplotypeCaller.${SAMPLE}.var_sites.vcf

java -jar $GATK \
    -T SelectVariants \
    -R ${RESDIR}/${REF}.fa \
    -V ${WORKDIR}/HaplotypeCaller.${SAMPLE}.var_sites.vcf \
    -o ${WORKDIR}/HaplotypeCaller.${SAMPLE}.het_sites.vcf \
    -selectType SNP \
    -select 'vc.getGenotype("HDF").isHet()'
```

### 6.1.2 Performing variant quality score recalibration

```
#!/bin/sh

source ReadConfig.sh $GLUSTER/Single-Cell/Config.HDF.SC
SAMPLE="HDF"
cd $GLUSTER/Single-Cell/RESULTS/

gatk VariantRecalibrator -R ${RESDIR}/${REF}.fa \
    --variant ${WORKDIR}/HaplotypeCaller.${SAMPLE}.het_sites.vcf \
    --resource \
    hapmap,known=false,training=true,truth=true,prior=15.0:hapmap_3.3.b37.vcf \
    --resource \
    omni,known=false,training=true,truth=false,prior=12.0:1000G_omni2.5.b37.vcf \
    --resource \
    1000G,known=false,training=true,truth=false,prior=10.0:\
    1000G_phase1.snps.high_confidence.b37.vcf \
    --resource \
    dbsnp,known=true,training=false,truth=false,prior=2.0:dbsnp_138.b37.vcf \
    --use-annotation QD \
    -an MQ \
    -an MQRankSum \
    -an ReadPosRankSum \
    -an FS \
    -an SOR \
    -an DP \
    -mode SNP \
```

```
--output output.recal \  
--tranches-file output.tranches \  
--rscript-file output.plots.R  
  
gatk ApplyVQSR \  
-R ${RESDIR}/${REF}.fa \  
-V ${WORKDIR}/HaplotypeCaller.${SAMPLE}.het_sites.vcf \  
-O ${WORKDIR}/HaplotypeCaller.${SAMPLE}.het_sites.VQSR.vcf \  
-ts-filter-level 99.0 \  
--tranches-file output.tranches \  
--recal-file output.recal \  
-mode SNP  
  
grep -e "^#" -e "PASS" ${WORKDIR}/HaplotypeCaller.${SAMPLE}.het_sites.VQSR.vcf > \  
${WORKDIR}/HaplotypeCaller.${SAMPLE}.het_sites.VQSR.PASS.vcf
```

### 6.1.3 Running mpileup on the bulk and the single-cells

```
#!/bin/sh  
  
samtools mpileup \  
-C50 -Osf ${RESDIR}/${REF}.fa \  
${WORKDIR}/${SAMPLE}.real.bam > \  
${WORKDIR}/SC.${SAMPLE}.mpileup
```

### 6.1.4 Indexing VCF files

```
#!/bin/sh  
  
bgzip -c ${WORKDIR}/HaplotypeCaller.${SAMPLE}.het_sites.VQSR.PASS.vcf > \  
${WORKDIR}/HaplotypeCaller.${SAMPLE}.het_sites.VQSR.PASS.vcf.gz  
tabix -p vcf ${WORKDIR}/HaplotypeCaller.${SAMPLE}.het_sites.VQSR.PASS.vcf.gz  
gatk IndexFeatureFile \  
-F ${WORKDIR}/HaplotypeCaller.${SAMPLE}.het_sites.VQSR.PASS.vcf.gz
```

### 6.1.5 Obtaining alternative allele fractions

```
#!/usr/bin/env python3  
  
import re  
import sys  
import tabix  
  
if sys.version_info[0] < 3:  
    raise "Please, consider upgrading your version to 3.x.x in order to run this script"  
  
if len(sys.argv) < 2:  
    sys.exit('Please, provide a sample name as argument')
```

```

print ("\nSetting up variables\n")
workdir="/mnt/gluster/distributed/home/uvi/be/tpf/Single-Cell/RESULTS/"
sample=sys.argv[1]
prefix="SC."
suffix=".mpileup"
min_depth=6

mismatches=['A','C','G','T','N','a','c','t','g','n']

# pytabix command to load vcf file previously bgzipped and tabixed
tb = tabix.open(workdir+"HaplotypeCaller.HDF.het_sites.VQSR.PASS.vcf.gz")

mpileup_name= workdir + prefix + sample + suffix
print("Loading data frame ",mpileup_name,"\n")
out = open(workdir+"AllelicFrequency."+sample+".txt","w")
with open(mpileup_name, mode='r') as f: # open the pileup file
    for line in f:
        cols=re.split(r'\t+', line)
        pos_mpileup=str(cols[0])+":"+str(cols[1])
        if (int(cols[3]) >= min_depth): # Pass positions without reads
            try:
                records = tb.queryrs(str(cols[0])+ ':' + str(cols[1]) + '-' + str(cols[1]))
            except tabix.TabixError:
                print("Ignoring:",cols[0],cols[1],"TabixError")
            else:
                for record in records:
                    ref_vcf=record[3]
                    alt_vcf=record[4]
                    try:
                        alt_vcf #check the variable was defined
                        ref_vcf
                    except NameError:
                        continue # continue to next for iteration in for line
                    else: # else from the try when it is not except
                        if (len(alt_vcf)>1):
                            #ref_mpileup=cols[2]
                            list_characters=list(cols[4])
                            list_bq=list(cols[5])
                            print(alt_vcf)
                            if "," not in alt_vcf:
                                print('Indel detected. Position will not be considered\n')
                                continue
                            alleles=alt_vcf.split(',')
                            ref_vcf=alleles[0]
                            alt_vcf=alleles[1]
                            pos=0
                            index=0
                            ref_count=0
                            alt_count=0
                            while pos < len(list_characters):

```

```

        if list_characters[pos]==".":
            pos += 1
            index+=1
        elif list_characters[pos]==",":
            pos+=1
            index+=1
        elif (list_characters[pos]=="^"):
            pos+=2
        elif (list_characters[pos]=="-") \
        | (list_characters[pos]=="+"):
            substring_list=list_characters[(pos+1):]
            substring=''.join(substring_list)
            num=re.search(r'(\d+)(\w+)', substring).groups()[0]
            pos+=1+len(str(num))+int(num)
        elif list_characters[pos] in mismatches:
            base_mpileup=list_characters[pos]
            base_mpileup_upper=base_mpileup.upper()
            if (base_mpileup_upper==alt_vcf):
                alt_count+=1
            elif (base_mpileup_upper==ref_vcf):
                ref_count+=1
            pos+=1
            index+=1
        else:
            pos += 1
            continue
    total_count=alt_count+ref_count
    if (total_count > 0):
        allele_fraction=alt_count/total_count
        out.write(sample+"\tchr"+pos_mpileup+"\t"+str(allele_fraction)+"\n")
    continue
elif (len(alt_vcf)==1):
    list_characters=list(cols[4])
    list_bq=list(cols[5])
    pos=0
    index=0
    ref_count=0
    alt_count=0
    while pos < len(list_characters):
        if list_characters[pos]==".":
            pos += 1
            index+=1
            ref_count+=1
        elif list_characters[pos]==",":
            pos+=1
            index+=1
            ref_count+=1
        elif (list_characters[pos]=="^"):
            pos+=2
        elif (list_characters[pos]=="-") | \
        (list_characters[pos]=="+"):
            substring_list=list_characters[(pos+1):]

```

```

        substring=''.join(substring_list)
        num=re.search(r'(\d+)(\w+)', substring).groups()[0]
        pos+=1+len(str(num))+int(num)
    elif list_characters[pos] in mismatches:
        alt_mpileup=list_characters[pos]
        alt_mpileup_upper=alt_mpileup.upper()
        if (alt_mpileup_upper==alt_vcf):
            alt_count+=1
        pos+=1
        index+=1
    else:
        pos += 1
        continue
    total_count=alt_count+ref_count
    if (total_count > 0):
        allele_fraction=alt_count/total_count
        out.write(sample+"\tchr"+pos_mpileup+"\t"+str(allele_fraction)+"\n")
else:
    continue

f.close()

```

## 6.2 Quantifying false SNVs and ADO

### 6.2.1 Running HaplotypeCaller on ERC mode for each single-cell

```

#!/bin/sh
#SBATCH -N 1
#SBATCH -n 1
#SBATCH --cpus-per-task 1

source ReadConfig.sh $1
SAMPLE=$(sed "${SLURM_ARRAY_TASK_ID}q;d" ${ORIDIR}/${SAMPLELIST})

java -jar $GATK \
    -T HaplotypeCaller \
    -nct 1 \
    --emitRefConfidence GVCF \
    --pcr_indel_model CONSERVATIVE \
    -R ${RESDIR}/${REF}.fa \
    -I ${WORKDIR}/${SAMPLE}.real.bam \
    --dbsnp ${RESDIR}/dbsnp_138.b37.vcf \
    -o ${WORKDIR}/HaplotypeCaller.${SAMPLE}.g.vcf

```

### 6.2.2 Runing HaplotypeCaller on ERC mode for the bulk. Set `-pcr_indel_model` to NONE as the sequencing library is PCR free.



```
#!/bin/sh
#SBATCH -N 1
#SBATCH -n 1
#SBATCH --cpus-per-task 8

source ReadConfig.sh $1
SAMPLE=$(echo $SAMPLELIST | sed 's/.txt//' | sed 's/SC_//' | sed 's/Files.//')

## IMPORTANT: when using PCR-free sequencing data we definitely
## recommend setting this argument to NONE
## HDF library: NxSeq AmpFREE Low DNA

java -jar $GATK \
    -T HaplotypeCaller \
    -nct 8 \
    --emitRefConfidence GVCF \
    --pcr_indel_model NONE \
    -R ${RESDIR}/${REF}.fa \
    -I ${WORKDIR}/${SAMPLE}.real.bam \
    --dbsnp ${RESDIR}/dbsnp_138.b37.vcf \
    -o ${WORKDIR}/HaplotypeCaller.${SAMPLE}.g.vcf
```

### 6.2.3 Running GenotypeGVCFs to perform a *joint calling* with the bulk and the 24 single-cells.

```
#!/bin/sh
#SBATCH -N 1
#SBATCH -n 1
#SBATCH --cpus-per-task 1

source ReadConfig.sh $1
cell_line=$(echo $SAMPLELIST | sed 's/.txt//' | sed 's/SC_//' | sed 's/Files.//')
samples=$(awk -v dir=$WORKDIR '{print "--variant "dir"/HaplotypeCaller."$0".g.vcf"}' \
    ${ORIDIR}/${SAMPLELIST} | tr '\n' ' ')

java -jar $GATK \
    -T GenotypeGVCFs \
    -R ${RESDIR}/${REF}.fa \
    --variant ${WORKDIR}/HaplotypeCaller.${cell_line}.g.vcf \
    ${samples} \
    --dbsnp ${RESDIR}/dbsnp_138.b37.vcf \
    -newQual \
    -o ${WORKDIR}/GenotypedGVCFs.${cell_line}.Joint.vcf
```

### 6.2.4 Running GenotypeGVFs to perform a marginal calling.

```
#!/bin/sh
#SBATCH -N 1
```

```
#SBATCH -n 1
#SBATCH --cpus-per-task 1

source ReadConfig.sh $1
SAMPLE=$(sed "${SLURM_ARRAY_TASK_ID}q;d" ${ORIDIR}/${SAMPLELIST})
cell_line=$(echo $SAMPLELIST | sed 's/.txt//' | sed 's/SC_//' | sed 's/Files.//')

java -jar $GATK \
    -T GenotypeGVCFs \
    -R ${RESDIR}/${REF}.fa \
    --variant ${WORKDIR}/HaplotypeCaller.${cell_line}.g.vcf \
    --variant ${WORKDIR}/HaplotypeCaller.${SAMPLE}.g.vcf \
    --dbsnp ${RESDIR}/dbsnp_138.b37.vcf \
    -o ${WORKDIR}/GenotypedGVCFs.${SAMPLE}.vcf
```

## 6.2.5 Calling somatic variants within the 24 single-cells using MonoVar

```
#!/bin/sh
#SBATCH -N 1
#SBATCH -n 1
#SBATCH --cpus-per-task 16

source ReadConfig.sh $1

awk -v dir=$WORKDIR '{print dir "/"$0".recal.bam"}' ${ORIDIR}/${SAMPLELIST} \
> ${WORKDIR}/MonovarSamples.txt
n_samples=$(wc -l ${WORKDIR}/MonovarSamples.txt | awk '{print $1}')

SAMPLE=$(echo $SAMPLELIST | sed 's/.txt//' | sed 's/SC_//' | sed 's/Files.//')

samtools mpileup \
    -BQ0 \
    -d10000 \
    -f ${RESDIR}/${REF}.fa \
    -q 40 \
    -b ${WORKDIR}/MonovarSamples.txt | monovar.py \
    -p 0.002 \
    -a 0.2 \
    -t 0.05 \
    -m 16 \
    -c 0 \
    -f ${RESDIR}/${REF}.fa \
    -b ${WORKDIR}/MonovarSamples.txt \
    -o ${WORKDIR}/MonoVarOutput.${SAMPLE}.vcf

fld=$(echo "$n_samples + 10" | bc)
awk -v fld=$fld '{if ($1 != /#/) {print $0"\t"gsub(/1|2/, "", $fld)} else {print $0}}' \
${WORKDIR}/MonoVarOutput.${SAMPLE}.vcf | \
awk '{if ($1 ~ /#/) {print $0} else if (($fld+1) > 1){print $0}}' > \
${WORKDIR}/MonoVarOutput.${SAMPLE}.filtered.vcf
awk -v fld=$fld '{if ($1 != /#/) {print $0"\t"gsub(/1/, "", $fld)} else {print $0}}' \
${WORKDIR}/MonoVarOutput.${SAMPLE}.vcf | \
```

```
awk '{if ($1 ~ /#/){print $0} else if (($fld+1) > 1){print $0}}' > \
${WORKDIR}/MonoVarOutput.${SAMPLE}.filtered.more1het.vcf
```

## 6.2.6 Creating the files needed to quantify ADO and false SNVs

```
#!/bin/sh
#SBATCH -N 1
#SBATCH -n 1
#SBATCH --cpus-per-task 1

source ReadConfig.sh $1
cell_line=$(echo $SAMPLELIST | sed 's/.txt//' | sed 's/SC_//' | sed 's/Files./')
SAMPLE=$(sed "${SLURM_ARRAY_TASK_ID}q;d" ${ORIDIR}/${SAMPLELIST})
sample=$SAMPLE

echo "java -jar $GATK \
-T SelectVariants \
-R ${RESDIR}/${REF}.fa \
-V ${WORKDIR}/GenotypedGVCFs.${SAMPLE}.vcf \
-o ${WORKDIR}/6XPaired.${SAMPLE}.vcf \
-selectType SNP \
-restrictAllelesTo BIALLELIC \
-select 'vc.getGenotype("${cell_line}").getDP() > 15 \
&& vc.getGenotype("${sample}").getDP() > 5' | bash -

echo "java -jar $GATK \
-T SelectVariants \
-R ${RESDIR}/${REF}.fa \
-V ${WORKDIR}/GenotypedGVCFs.HDF.Joint.vcf \
-o ${WORKDIR}/6XJoint.${SAMPLE}.vcf \
-selectType SNP \
-restrictAllelesTo BIALLELIC \
-select 'vc.getGenotype("${cell_line}").getDP() > 15 && \
vc.getGenotype("${sample}").getDP() > 5' | bash -

echo "java -jar $GATK \
-T SelectVariants \
-R ${RESDIR}/${REF}.fa \
-V ${WORKDIR}/6XPaired.${SAMPLE}.vcf \
-o ${WORKDIR}/FP_00-01_Paired.${SAMPLE}.vcf \
-select 'vc.getGenotype("${cell_line}").isHomRef() \
&& vc.getGenotype("${cell_line}").getAD().1 < 2 && \
vc.getGenotype("${sample}").isHet()' | bash -
# Exclude somatic mutations detected at least in two cells with monovar
# monovar
vcftools --vcf ${WORKDIR}/FP_00-01_Paired.${SAMPLE}.vcf \
--exclude-bed ${WORKDIR}/MonoVarOutput.${cell_line}.filtered.bed \
--recode --stdout > ${WORKDIR}/FP_00-01_Paired.filtered.${SAMPLE}.vcf
```

```

echo "java -jar $GATK \
    -T SelectVariants \
    -R ${RESDIR}/${REF}.fa \
    -V ${WORKDIR}/6XJoint.${SAMPLE}.vcf \
    -o ${WORKDIR}/FP_00-01_Joint.${SAMPLE}.vcf \
    -select 'vc.getGenotype("${cell_line}").isHomRef() && \
vc.getGenotype("${cell_line}").getAD().1 < 2 && \
vc.getGenotype("${sample}").isHet()' | bash -
vcftools --vcf ${WORKDIR}/FP_00-01_Joint.${SAMPLE}.vcf \
--exclude-bed ${WORKDIR}/MonoVarOutput.${cell_line}.filtered.bed --recode \
--stdout > ${WORKDIR}/FP_00-01_Joint.filtered.${SAMPLE}.vcf
# 1/1 -> 0/1
echo "java -jar $GATK \
    -T SelectVariants \
    -R ${RESDIR}/${REF}.fa \
    -V ${WORKDIR}/6XPaired.${SAMPLE}.vcf \
    -o ${WORKDIR}/FP_11-01_Paired.${SAMPLE}.vcf \
    -select 'vc.getGenotype("${cell_line}").isHomVar() && \
vc.getGenotype("${cell_line}").getAD().0 < 2 && \
vc.getGenotype("${sample}").isHet()' | bash -
vcftools --vcf ${WORKDIR}/FP_11-01_Paired.${SAMPLE}.vcf \
--exclude-bed ${WORKDIR}/MonoVarOutput.${cell_line}.filtered.more1het.bed \
--recode --stdout > ${WORKDIR}/FP_11-01_Paired.filtered.${SAMPLE}.vcf
echo "java -jar $GATK \
    -T SelectVariants \
    -R ${RESDIR}/${REF}.fa \
    -V ${WORKDIR}/6XJoint.${SAMPLE}.vcf \
    -o ${WORKDIR}/FP_11-01_Joint.${SAMPLE}.vcf \
    -select 'vc.getGenotype("${cell_line}").isHomVar() && \
vc.getGenotype("${cell_line}").getAD().0 < 2 && \
vc.getGenotype("${sample}").isHet()' | bash -
vcftools --vcf ${WORKDIR}/FP_11-01_Joint.${SAMPLE}.vcf \
--exclude-bed ${WORKDIR}/MonoVarOutput.${cell_line}.filtered.more1het.bed \
--recode --stdout > ${WORKDIR}/FP_11-01_Joint.filtered.${SAMPLE}.vcf

# Count homozygous genotypes for both the reference and
# alternative alleles in the bulk with enough coverage in single-cells
echo "java -jar $GATK \
    -T SelectVariants \
    -R ${RESDIR}/${REF}.fa \
    -V ${WORKDIR}/6XPaired.${SAMPLE}.vcf \
    -o ${WORKDIR}/TotalHomozygous_6X_Paired.${SAMPLE}.vcf \
    -select 'vc.getGenotype("${cell_line}").isHomRef() || \
vc.getGenotype("${cell_line}").isHomVar()' | bash -
echo "java -jar $GATK \
    -T SelectVariants \
    -R ${RESDIR}/${REF}.fa \
    -V ${WORKDIR}/6XJoint.${SAMPLE}.vcf \
    -o ${WORKDIR}/TotalHomozygous_6X_Joint.${SAMPLE}.vcf \
    -select 'vc.getGenotype("${cell_line}").isHomRef() || \
vc.getGenotype("${cell_line}").isHomVar()' | bash -

```

```
# ADO
# 0/1 -> 0/0
echo "java -jar $GATK \
-T SelectVariants \
-R ${RESDIR}/${REF}.fa \
-V ${WORKDIR}/6XPaired.${SAMPLE}.vcf \
-o ${WORKDIR}/ADO_01-00_Paired.${SAMPLE}.vcf \
-select 'vc.getGenotype("${cell_line}").isHet() && \
vc.getGenotype("${sample}").isHomRef()' | bash -
echo "java -jar $GATK \
-T SelectVariants \
-R ${RESDIR}/${REF}.fa \
-V ${WORKDIR}/6XJoint.${SAMPLE}.vcf \
-o ${WORKDIR}/ADO_01-00_Joint.${SAMPLE}.vcf \
-select 'vc.getGenotype("${cell_line}").isHet() && \
vc.getGenotype("${sample}").isHomRef()' | bash -

# 0/1 -> 1/1
echo "java -jar $GATK \
-T SelectVariants \
-R ${RESDIR}/${REF}.fa \
-V ${WORKDIR}/6XPaired.${SAMPLE}.vcf \
-o ${WORKDIR}/ADO_01-11_Paired.${SAMPLE}.vcf \
-select 'vc.getGenotype("${cell_line}").isHet() && \
vc.getGenotype("${sample}").isHomVar()' | bash -
echo "java -jar $GATK \
-T SelectVariants \
-R ${RESDIR}/${REF}.fa \
-V ${WORKDIR}/6XJoint.${SAMPLE}.vcf \
-o ${WORKDIR}/ADO_01-11_Joint.${SAMPLE}.vcf \
-select 'vc.getGenotype("${cell_line}").isHet() && \
vc.getGenotype("${sample}").isHomVar()' | bash -

# Count heterozygous genotypes in the bulk with enough coverage in single-cells
echo "java -jar $GATK \
-T SelectVariants \
-R ${RESDIR}/${REF}.fa \
-V ${WORKDIR}/6XPaired.${SAMPLE}.vcf \
-o ${WORKDIR}/TotalHeterozygous_6X_Paired.${SAMPLE}.vcf \
-select 'vc.getGenotype("${cell_line}").isHet()' | bash -
echo "java -jar $GATK \
-T SelectVariants \
-R ${RESDIR}/${REF}.fa \
-V ${WORKDIR}/6XJoint.${SAMPLE}.vcf \
-o ${WORKDIR}/TotalHeterozygous_6X_Joint.${SAMPLE}.vcf \
-select 'vc.getGenotype("${cell_line}").isHet()' | bash -
```

## 6.2.7 Counting the number of positions showing ADO, false SNVs and passing filters

```
#!/bin/sh
#SBATCH -N 1
#SBATCH -n 1
#SBATCH --cpus-per-task 1

while read sample
do
FP1=$(grep -v "^#" FP_00-01_Joint.filtered.$sample.vcf | wc -l)
FP2=$(grep -v "^#" FP_11-01_Joint.filtered.$sample.vcf | wc -l)
total=$(grep -v "^#" TotalHomozygous_6X_Joint.$sample.vcf | wc -l)
bc=$(bc -l <<< "(($FP1+$FP2)/$total)*100")
echo $FP1 $FP2 $total
printf "%.2f\n" $bc >> FP.Joint.txt
done < /mnt/gluster/distributed/home/uvi/be/tpf/Single-Cell/SC_HDF.txt

while read sample
do
FP1=$(grep -v "^#" FP_00-01_Paired.filtered.$sample.vcf | wc -l)
FP2=$(grep -v "^#" FP_11-01_Paired.filtered.$sample.vcf | wc -l)
total=$(grep -v "^#" TotalHomozygous_6X_Paired.$sample.vcf | wc -l)
bc=$(bc -l <<< "(($FP1+$FP2)/$total)*100")
echo $FP1 $FP2 $total
printf "%.2f\n" $bc >> FP.Paired.txt
done < /mnt/gluster/distributed/home/uvi/be/tpf/Single-Cell/SC_HDF.txt

while read sample
do
ADO1=$(grep -v "^#" ADO_01-00_Joint.$sample.vcf | wc -l)
ADO2=$(grep -v "^#" ADO_01-11_Joint.$sample.vcf | wc -l)
total=$(grep -v "^#" TotalHeterozygous_6X_Joint.$sample.vcf | wc -l)
bc=$(bc -l <<< "(($ADO1+$ADO2)/$total)*100")
echo $sample $ADO1 $ADO2 $total $bc
printf "%.2f\n" $bc >> ADO.Joint.txt
done < /mnt/gluster/distributed/home/uvi/be/tpf/Single-Cell/SC_HDF.txt

while read sample
do
ADO1=$(grep -v "^#" ADO_01-00_Paired.$sample.vcf | wc -l)
ADO2=$(grep -v "^#" ADO_01-11_Paired.$sample.vcf | wc -l)
total=$(grep -v "^#" TotalHeterozygous_6X_Paired.$sample.vcf | wc -l)
bc=$(bc -l <<< "(($ADO1+$ADO2)/$total)*100")
echo $sample $ADO1 $ADO2 $total $bc
printf "%.2f\n" $bc >> ADO.Paired.txt
done < /mnt/gluster/distributed/home/uvi/be/tpf/Single-Cell/SC_HDF.txt
```

## 7 Quantifying chimeric amplicons

```
#!/bin/sh
#SBATCH -N 1
#SBATCH -n 1
#SBATCH --cpus-per-task 1

source ReadConfig.sh $1
SAMPLE=$(sed "${SLURM_ARRAY_TASK_ID}q;d" ${ORIDIR}/${SAMPLELIST})
echo $SAMPLE

java -jar $PICARD CollectAlignmentSummaryMetrics \
    R=${RESDIR}/${REF}.fa \
    I=${WORKDIR}/${SAMPLE}.dedup.bam \
    O=${WORKDIR}/${SAMPLE}.alignment_summary_metrics_all.txt \
    MAX_INSERT_SIZE=1000

awk '/^CATEGORY/ {split($0,header);n=1;next; } {if(n!=1) next; for(i=2;i<=NF;++i) \
    printf("%s\t%s\t%s\n",$1,header[i],$i);}' \
    ${WORKDIR}/${SAMPLE}.alignment_summary_metrics_all.txt | \
    column -t | grep "^PAIR" > ${WORKDIR}/${SAMPLE}.alignment_summary_metrics.txt

# Select first in paired reads (64)
split_1=$(samtools view -F 64 ${WORKDIR}/${SAMPLE}.dedup.bam | \
    grep "SA:Z" | awk '{print $1}' | sort -k1,1 | uniq | wc -l)
# Select second in paired reads (128)
split_2=$(samtools view -F 128 ${WORKDIR}/${SAMPLE}.dedup.bam | \
    grep "SA:Z" | awk '{print $1}' | sort -k1,1 | uniq | wc -l)
split=$(echo "$split_1+$split_2" | bc -l)
discordant=$(grep "PCT_CHIMERAS" ${WORKDIR}/${SAMPLE}.alignment_summary_metrics.txt | \
    awk '{print $3*100}') # Although the variable name is PCT_ADAPTER,
                        # it is a proportion, so I multiply by 100

echo $split $discordant
```

## 8 Estimating copy-number profiles and MAD values

Downsample bam files to the lowest sequencing depth found for each cell line

```
#!/bin/sh
#SBATCH -N 1
#SBATCH -n 1
#SBATCH --cpus-per-task 1

source ReadConfig.sh $1
SAMPLE=$(sed "${SLURM_ARRAY_TASK_ID}q;d" ${ORIDIR}/${SAMPLELIST})
echo $SAMPLE

config=$(basename $1 | sed 's/.txt//' | sed 's/Config.//' | sed 's/.SC//')
sequencing_depth=$(awk '{print $2}' ${WORKDIR}/${SAMPLE}.seqdepth.txt)
# Obtain the lowest seqdepth of all cells from the same cell line
# by cat *HDF*.seqdepth.txt > HDF.seqdepths.txt
subsampling_depth=$(awk '{print $2}' ${WORKDIR}/${config}.seqdepths.txt \
| sort -n | head -n 1) to create the file
## Calculating subsampling probability
probability=`bc -l <<< "scale=3; $subsampling_depth / $sequencing_depth"`
echo "Downsampling probability: "$probability
strategy="Chained"
echo "Downsampling following "${strategy}" strategy. \
From "${sequencing_depth}"X to "${subsampling_depth}"X."
java -jar $PICARD DownsampleSam \
    INPUT=${WORKDIR}/${SAMPLE}.dedup.bam \
    OUTPUT=${WORKDIR}/${SAMPLE}.dedup.ps.bam \
    RANDOM_SEED=1 \
    PROBABILITY=${probability} \
    STRATEGY=$strategy
```

Create ginkgo input

```
#!/bin/sh
#SBATCH -N 1
#SBATCH -n 1
#SBATCH --cpus-per-task 1

source ReadConfig.sh $1
SAMPLE=$(sed "${SLURM_ARRAY_TASK_ID}q;d" ${ORIDIR}/${SAMPLELIST})
echo $SAMPLE

samtools view -bq 20 ${WORKDIR}/${SAMPLE}.dedup.ps.bam | \
    bedtools bamtobed -i stdin | gzip > \
    ${WORKDIR}/${SAMPLE}.dedup.ps.bed.gz
```

### 8.1 Running ginkgo on the web server

We added bed files to the ginkgo web server, selected all cells, wrote down a job name and modified some advanced parameters. We adjusted *Binning Simulation Options* to 150 bp reads and *BWA mapping*.
